# Supplementary material
Source: publisher site journal article supplement (https://www.dovepress.com/article/342799)
Supplement: Supplementary file 1 [file get_supplementary_file.php]

## **Supplementary Materials**

**A**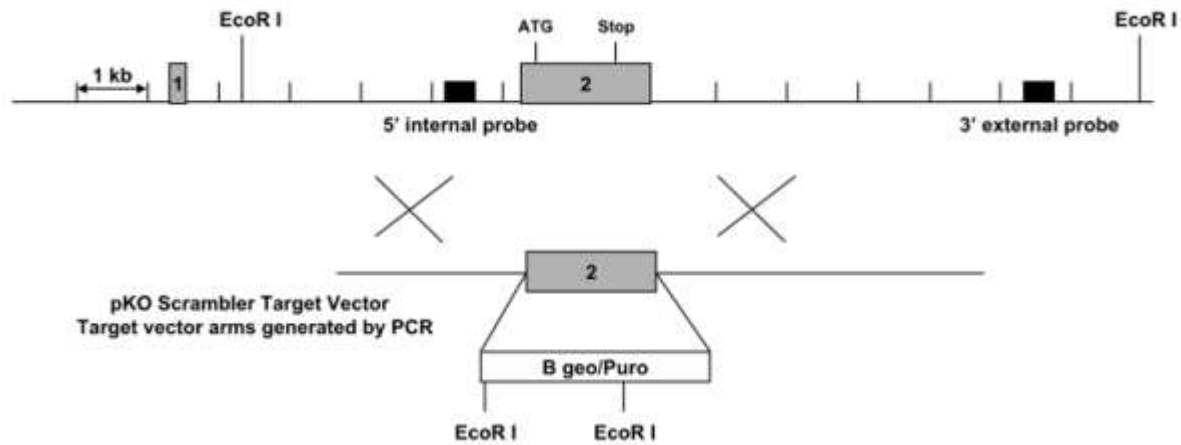**B**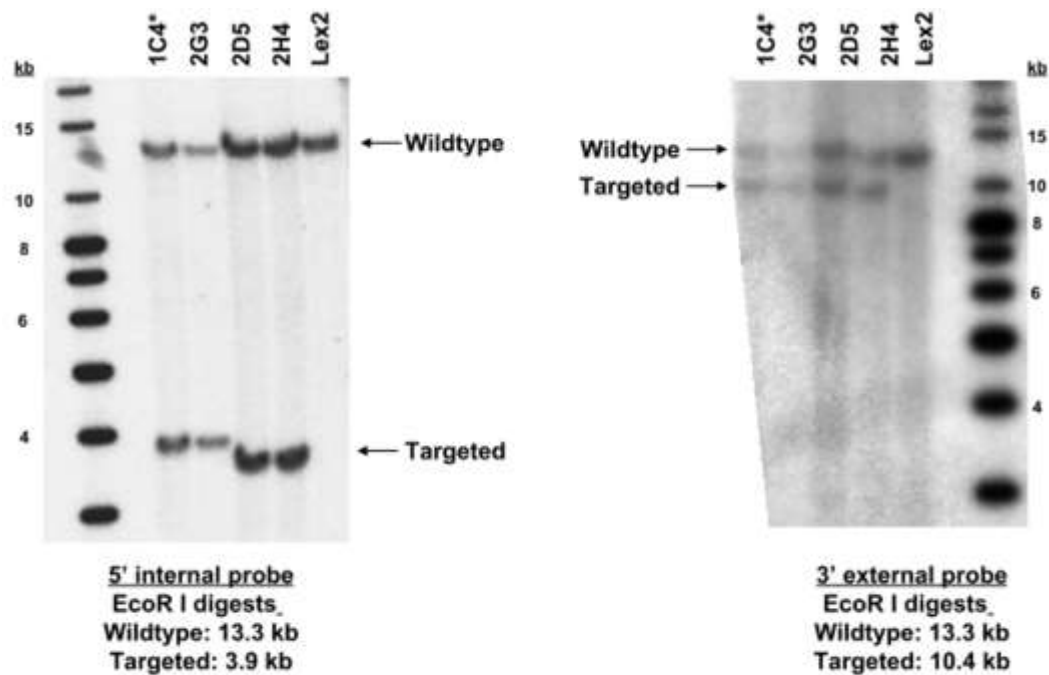

\* Clone achieving germline transmission

**Supplementary Figure 1.** Targeting strategy and Southern blot confirmation of the *Gpr75* gene mutation. **(A)** Homologous recombination between the pKO Scrambler targeting vector and the *Gpr75* gene resulted in the replacement of exon 2 with the Betagalactosidase-Neomycin/Puromycin (B geo/puro) selection cassette. Restriction enzyme recognition sites are indicated by EcoR I. ATG represents the translation start site. **(B)** Southern hybridization indicating *Gpr75* gene targeting in the embryonic stem cell clones. Clones 1C4, 2G3, 2D5, and 2H4 were analyzed by Southern blot analysis using EcoR I digested genomic DNA with a 5' internal probe and a 3' external probe. Two targeted clones were selected for blastocyst injections. An asterisk (\*) indicates the clone that was transmitted through the germ line. Band sizes are indicated in kilobases (kb) using a labeled size marker. Lex2 represents untransfected embryonic stem cell DNA.

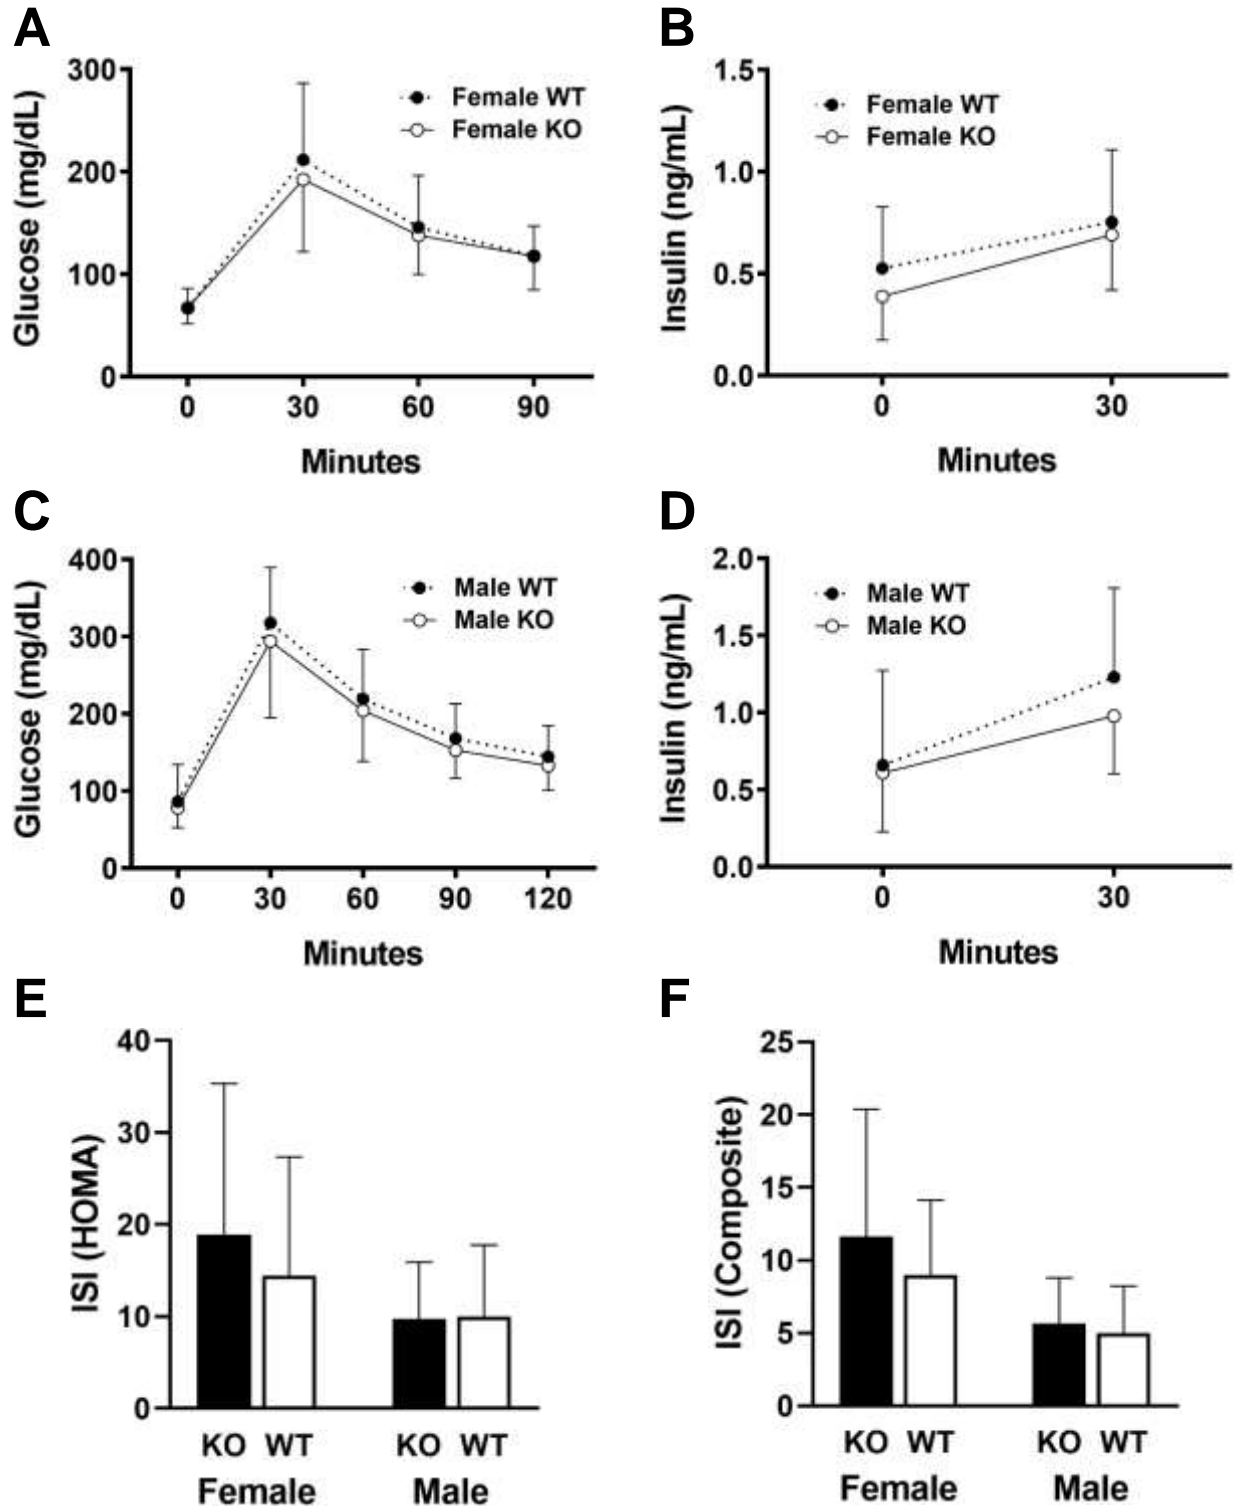

**Supplementary Figure 2.** OGTTs performed in 9-week-old *Gpr75* KO and WT mice fed HFD from weaning. **(A)** Glucose excursions, and **(B)** 0- and 30-minute insulin levels, measured in female *Gpr75* KO (n=16) and WT (n=20) mice. **(C)** Glucose excursions, and **(D)** 0- and 30-minute insulin levels, measured in male *Gpr75* KO (n=21) and WT (n=19) mice. **(E)** HOMA and **(F)** composite insulin sensitivity index (ISI) values for female and male mice.

**Supplementary Table 1. Body composition of adult *Gpr75* mouse cohorts**

| Mouse cohort and diet | Age (weeks) | Sex and Genotype | N  | Body Weight (g)       | % Body Fat            | Body Fat (g)              | LBM (g)              |
|-----------------------|-------------|------------------|----|-----------------------|-----------------------|---------------------------|----------------------|
| Cohort 1, chow        | 14          | Male WT          | 2  | 27 ± 1                | 19 ± 3                | 5.1 ± 1.0                 | 21 ± 1               |
|                       |             | Male KO          | 4  | 28 ± 1                | 15 ± 1                | 4.3 ± 0.3                 | 23 ± 1               |
|                       |             | Female WT        | 2  | 21 ± 1                | 23 ± 1                | 4.8 ± 0.2                 | 16 ± 1               |
|                       |             | Female KO        | 4  | 21 ± 3                | 19 ± 4                | 4.0 ± 1.1                 | 16 ± 2               |
| Cohort 2, HFD         | 11          | Male WT          | 8  | 34 ± 4                | 23 ± 7                | 7.9 ± 3.1                 | 26 ± 2               |
|                       |             | Male KO          | 8  | 26 ± 3 <sup>***</sup> | 12 ± 4 <sup>***</sup> | 3.0 ± 0.9 <sup>***†</sup> | 23 ± 3 <sup>*</sup>  |
| Cohort 3, chow        | 23-24       | Male WT          | 10 | 41 ± 4                | 23 ± 4                | 9.5 ± 1.9                 | 31 ± 3               |
|                       |             | Male KO          | 4  | 34 ± 1 <sup>**</sup>  | 13 ± 3 <sup>***</sup> | 4.2 ± 1.1 <sup>***</sup>  | 30 ± 1               |
| Cohort 4, chow        | 14-16       | Male WT          | 3  | 30 ± 2                | 13 ± 4                | 4.1 ± 1.3                 | 26 ± 1               |
|                       |             | Male KO          | 5  | 32 ± 4                | 9 ± 2                 | 3.0 ± 0.9                 | 28 ± 3               |
| Cohort 5, chow        | 16-18       | Female WT        | 14 | 24 ± 2                | 20 ± 4                | 4.8 ± 1.3                 | 19 ± 2               |
|                       |             | Female KO        | 16 | 20 ± 2 <sup>***</sup> | 14 ± 3 <sup>***</sup> | 3.0 ± 0.9 <sup>***</sup>  | 18 ± 1               |
| Cohort 6, HFD         | 23-24       | Male WT          | 14 | 47 ± 6                | 35 ± 7                | 16.5 ± 4.7                | 30 ± 3               |
|                       |             | Male KO          | 22 | 36 ± 5 <sup>***</sup> | 22 ± 7 <sup>***</sup> | 8.2 ± 3.5 <sup>***</sup>  | 28 ± 2 <sup>**</sup> |
|                       |             | Female WT        | 11 | 33 ± 3                | 35 ± 6                | 11.4 ± 2.6                | 21 ± 2               |
|                       |             | Female KO        | 18 | 25 ± 3 <sup>***</sup> | 16 ± 6 <sup>***</sup> | 4.1 ± 2.0 <sup>***</sup>  | 20 ± 2               |
| Cohort 7, HFD         | 15          | Male WT          | 10 | 40 ± 6                | 31 ± 7                | 13.0 ± 4.4                | 27 ± 2               |
|                       |             | Male KO          | 12 | 33 ± 4 <sup>**</sup>  | 19 ± 5 <sup>***</sup> | 6.2 ± 2.2 <sup>***†</sup> | 27 ± 3               |
|                       |             | Female WT        | 11 | 28 ± 4                | 32 ± 7                | 9.1 ± 3.2                 | 18 ± 1               |
|                       |             | Female KO        | 7  | 23 ± 2 <sup>**†</sup> | 22 ± 4 <sup>**</sup>  | 4.9 ± 1.0 <sup>**†</sup>  | 18 ± 1               |

Table continues on next page

Supplementary Table 1, continued

| Mouse cohort and diet | Age (weeks) | Sex and Genotype | N | Body Weight (g)       | % Body Fat            | Body Fat (g)             | LBM (g) |
|-----------------------|-------------|------------------|---|-----------------------|-----------------------|--------------------------|---------|
| Cohort 8, HFD         | 15          | Male WT          | 9 | 33 ± 3                | 29 ± 5                | 9.8 ± 2.5                | 23 ± 1  |
|                       |             | Male KO          | 9 | 26 ± 3 <sup>***</sup> | 16 ± 5 <sup>***</sup> | 4.3 ± 1.8 <sup>***</sup> | 22 ± 2  |
|                       |             | Female WT        | 9 | 21 ± 3                | 25 ± 4                | 5.4 ± 1.6                | 16 ± 1  |
|                       |             | Female KO        | 9 | 20 ± 2                | 16 ± 3 <sup>***</sup> | 3.4 ± 0.8 <sup>**</sup>  | 17 ± 2  |

**Notes:** KO mice different from WT mice, \* $P < 0.05$ ; \*\* $P < 0.01$ ; \*\*\* $P < 0.001$ ; † Mann-Whitney test

**Abbreviations:** N, number of mice; g, grams; LBM, lean body mass; WT, wild type; KO, knockout; HFD, high fat diet

**Supplementary Table 2. Activity of *Gpr75* KO and WT mice in circadian rhythm chambers**

| Day | Activity counts, dark cycle |            |             |             | Activity counts, light cycle |           |           |           |
|-----|-----------------------------|------------|-------------|-------------|------------------------------|-----------|-----------|-----------|
|     | F KO (9)                    | F WT (9)   | M KO (9)    | M WT (9)    | F KO (9)                     | F WT (9)  | M KO (9)  | M WT (9)  |
| 1   | 1289 ± 536                  | 1396 ± 562 | 1700 ± 752  | 1929 ± 947  | 606 ± 193                    | 749 ± 385 | 838 ± 368 | 998 ± 350 |
| 2   | 1474 ± 543                  | 1798 ± 796 | 2083 ± 949  | 2148 ± 680  | 558 ± 174                    | 770 ± 411 | 874 ± 424 | 940 ± 344 |
| 3   | 1543 ± 551                  | 1663 ± 782 | 2278 ± 826  | 2097 ± 566  | 723 ± 305                    | 801 ± 413 | 906 ± 394 | 915 ± 405 |
| 4   | 1934 ± 655                  | 1633 ± 719 | 2425 ± 1061 | 2343 ± 600  | 499 ± 289                    | 547 ± 300 | 673 ± 361 | 697 ± 308 |
| 5   | 1816 ± 595                  | 1684 ± 787 | 2755 ± 1168 | 2456 ± 513  | 680 ± 361                    | 563 ± 345 | 798 ± 400 | 793 ± 298 |
| 6   | 1821 ± 534                  | 1934 ± 775 | 2726 ± 1174 | 2575 ± 657  |                              |           |           |           |
| 7   | 1159 ± 727                  | 1157 ± 581 | 1684 ± 847  | 1532 ± 1249 | 459 ± 375                    | 519 ± 167 | 590 ± 397 | 629 ± 432 |
| 8   | 1168 ± 691                  | 901 ± 375  | 1311 ± 521  | 1273 ± 1164 | 488 ± 429                    | 474 ± 193 | 429 ± 295 | 524 ± 231 |
| 9   | 1232 ± 653                  | 1024 ± 526 | 1246 ± 613  | 1140 ± 877  | 449 ± 322                    | 432 ± 179 | 430 ± 213 | 503 ± 265 |
| 10  | 1116 ± 574                  | 969 ± 439  | 1188 ± 553  | 1143 ± 828  | 473 ± 270                    | 466 ± 221 | 447 ± 242 | 481 ± 177 |
| 11  | 1212 ± 701                  | 1014 ± 431 | 1276 ± 729  | 1230 ± 890  | 289 ± 185                    | 324 ± 161 | 280 ± 146 | 306 ± 112 |
| 12  | 1213 ± 620                  | 1092 ± 512 | 1373 ± 780  | 1364 ± 818  | 282 ± 175                    | 312 ± 147 | 269 ± 143 | 320 ± 160 |
| 13  | 1117 ± 608                  | 1188 ± 647 | 1399 ± 659  | 1335 ± 695  |                              |           |           |           |
| 15  | 793 ± 372                   | 743 ± 359  | 1588 ± 996  | 1386 ± 872  |                              |           |           |           |
| 16  | 844 ± 471                   | 808 ± 364  | 1794 ± 1026 | 1541 ± 1024 | 316 ± 42                     | 302 ± 114 | 498 ± 428 | 658 ± 466 |
| 17  | 844 ± 434                   | 787 ± 455  | 1861 ± 1134 | 1478 ± 904  | 541 ± 123*                   | 412 ± 115 | 805 ± 482 | 823 ± 426 |
| 18  | 757 ± 465                   | 702 ± 358  | 1880 ± 1128 | 1537 ± 1312 | 360 ± 88*                    | 251 ± 101 | 514 ± 436 | 524 ± 348 |
| 19  | 917 ± 482                   | 713 ± 302  | 2033 ± 1259 | 1524 ± 914  | 308 ± 68                     | 282 ± 150 | 476 ± 445 | 579 ± 280 |
| 24  | 836 ± 473                   | 694 ± 312  | 1211 ± 746  | 1404 ± 656  | 694 ± 421                    | 479 ± 204 | 944 ± 583 | 975 ± 343 |
| 25  | 1009 ± 519                  | 851 ± 307  | 1588 ± 1014 | 1790 ± 980  | 486 ± 243                    | 384 ± 130 | 614 ± 379 | 772 ± 319 |

Table continues on next page

Supplementary Table 2, continued

| Day | Activity counts, dark cycle |           |             |             | Activity counts, light cycle |           |           |           |
|-----|-----------------------------|-----------|-------------|-------------|------------------------------|-----------|-----------|-----------|
|     | F KO (9)                    | F WT (9)  | M KO (9)    | M WT (9)    | F KO (9)                     | F WT (9)  | M KO (9)  | M WT (9)  |
| 26  | 1098 ± 442                  | 850 ± 385 | 2119 ± 1567 | 2051 ± 1243 | 601 ± 390                    | 473 ± 192 | 717 ± 413 | 916 ± 328 |
| 27  | 1040 ± 477                  | 954 ± 397 | 2251 ± 2046 | 2001 ± 1252 | 412 ± 219                    | 332 ± 295 | 526 ± 377 | 588 ± 269 |

**Notes:** Female KO mice different from female WT mice, \* $P < 0.05$

**Abbreviations:** F, female; M, male; KO, knockout; WT, wild type; (N), number of mice
